# Supplementary material for: Genetic Variability, Population Differentiation, and Correlations for Thermal Tolerance Indices in the Minute Wasp, Trichogramma cacoeciae
Source: MDPI journal article supplement (doi:10.3390/insects12111013), 2021-11-10
Supplement: s1 [file s1]

## Supplementary materials

Supplementary Materials Table S1: Summary of reference strains used for the molecular characterization of the *Trichogramma cacoeciae* used in this study.

Haplotypes corresponding to the strains used in this study are indicated in bold.

The columns “reproduction” “amino-acid sequence” respectively indicate the mode of reproduction of the strain (A=Arrhenotoky – T=Thelytoky) as well as variation in the corresponding amino-acid sequence (label “varprot”) and thus putative pseudogene or technical artefacts.

Upper part: strains available at the Biological Resource Center “Egg Parasitoids Collection” (doi.org/10.15454/AY4LMT)(source : Warot 2018).

Identification were formely realized by B. Pintureau.

Lower part : Genbank references

| Haplotypes                                       | Reference strain | Strain's origin          | Identification         | Reproduction | GENBANK Accession | Amino-acid sequence |
|--------------------------------------------------|------------------|--------------------------|------------------------|--------------|-------------------|---------------------|
| <i>Information obtained from the BRC EP-Coll</i> |                  |                          |                        |              |                   |                     |
| <b>Hap_006</b>                                   | <b>TCAL</b>      | <b>France, 1987-1989</b> | <i>T. cacoeciae</i>    | <b>T</b>     | <b>MG932142</b>   |                     |
| <b>Hap_007</b>                                   | <b>TCMz</b>      | <b>France, 1987-1989</b> | <i>T. cacoeciae</i>    | <b>T</b>     | <b>MG932143</b>   |                     |
| <b>Hap_019</b>                                   | <b>PMBio1</b>    | <b>France, 2014</b>      | –                      | <b>T</b>     | <b>MG932155</b>   |                     |
| <b>Hap_020</b>                                   | <b>ISA15034</b>  | <b>France, 2016</b>      | –                      | <b>T</b>     | <b>MG932156</b>   | <b>varprot</b>      |
| Hap_064                                          | 101              | France, 1976             | <i>T. cacoeciae</i>    | T            | MG932198          |                     |
| Hap_065                                          | URO2             | Iran, 1996               | <i>T. embryophagum</i> | A            | MG932199          |                     |
| Hap_066                                          | URO3             | Iran, 1996               | <i>T. embryophagum</i> | A            | MG932200          |                     |
| Hap_075                                          | Grab_haplo7      | France, 2011             | –                      |              | MG932209          |                     |
| Hap_076                                          | GOT0098          | France, 2016             | –                      |              | MG932210          |                     |
| Hap_077                                          | ISA11030         | France, 2016             | –                      |              | MG932211          |                     |
| Hap_078                                          | Grab_haplo10     | France, 2011             | –                      |              | MG932212          |                     |
| Hap_086                                          | COR10 sp1        | France (Corsica), 2016   | –                      |              | MG932216          |                     |
| Hap_087                                          | –                | –                        | –                      |              | KM242285          | varprot             |
| Hap_088                                          | –                | –                        | –                      |              | DQ177917          |                     |
| Hap_101                                          | ACJYR0132        | France, 2015             | –                      |              | MG932224          | varprot             |

|                |                |                        |   |          |                 |         |
|----------------|----------------|------------------------|---|----------|-----------------|---------|
| Hap_102        | —              | —                      | — |          | KM105169        | varprot |
| Hap_106        | ACJYR0116      | France, 2015           | — |          | MG932227        |         |
| Hap_107        | ACJYR0121      | France, 2015           | — |          | MG932228        |         |
| Hap_108        | NS008          | France, 2015           | — | A        | MG932229        |         |
| Hap_117        | ESP227         | Spain, 2016            | — |          | MG932236        |         |
| Hap_118        | PMBIO2         | France, 2014           | — |          | MG932237        |         |
| <b>Hap_119</b> | <b>ISA4737</b> | <b>France, 2016</b>    | — | <b>T</b> | <b>MG932238</b> |         |
| <b>Hap_120</b> | <b>ISA4561</b> | <b>France, 2016</b>    | — | <b>T</b> | <b>MG932239</b> |         |
| Hap_135        | COR7           | France (Corsica), 2016 | — |          | MG932253        |         |
| Hap_142        | ISA6151_R2.6   | France, 2016           | — |          | MG932260        |         |
| Hap_145        | GOT0098        | France, 2016           | — |          | MG932262        |         |
| Hap_150        | ISA12949       | France, 2016           | — |          | MG932267        |         |
| Hap_158        | ISA11783       | France, 2016           | — |          | MG932274        |         |
| Hap_159        | ISA12953       | France, 2016           | — |          | MG932275        |         |
| Hap_162        | ISA15036       | France, 2016           | — |          | MG932277        |         |
| Hap_173        | FLO218         | France, 2016           | — |          | MG932282        |         |
| Hap_177        | ISA7851_9      | France, 2016           | — |          | MG932285        |         |
| Hap_179        | ISA11365_2     | France, 2016           | — |          | MG932287        |         |
| Hap_187        | ISA10468.2     | France, 2016           | — |          | MG932295        |         |
| Hap_196        | Pch1           | Algeria, 2017          | — | A        | MG932303        |         |
| Hap_197        | Pch1           | Algeria, 2017          | — | A        | MG932304        |         |
| Hap_198        | Pch2           | Algeria, 2017          | — | A        | MG932305        |         |

---

*Complementary data obtained from Genbank*

|         |   |   |                      |          |
|---------|---|---|----------------------|----------|
| Hap_088 | — | — | <i>T. cacoeciae</i>  | DQ177917 |
| Hap_095 | — | — | <i>T. chilonis</i>   | DQ177915 |
| Hap_098 | — | — | <i>T. dendrolimi</i> | KC411494 |
| Hap_103 | — | — | <i>T. ostriniae</i>  | DQ177914 |

---

# Supplementary Materials Table S2: Summary of the statistical models evaluated in the study.

According to the selection on the random effects, the nature of the model was either a Linear Mixed Effects model (LME) or a Linear model (LM). For each of the traits, the two approaches were presented, *i.e.* the Test hypothesis (“Origin” as the sole fixed effect) and the Model comparison. In this second case, the null model and the 31 possible combinations obtained from the two meteorological variables (t\_mean and t\_mini) and the geographic ones (alt, lat and lon) are provided. The model minimizing the Information criteria (cAIC for LME and AIC for LM) is indicated in bold.

| Trait                                                  | Approach         | Parameters   | Origin | t_mean | t_mini | alt | lat | lon | cAIC /AIC     |
|--------------------------------------------------------|------------------|--------------|--------|--------|--------|-----|-----|-----|---------------|
| <b>CTmin (LME - site x haplotype as random factor)</b> |                  |              |        |        |        |     |     |     |               |
|                                                        | Test hypothesis  | 1 parameter  | X      |        |        |     |     |     | 104.19        |
|                                                        | Model comparison | Null model   |        |        |        |     |     |     | <b>104.11</b> |
|                                                        |                  | 1 parameter  |        | X      |        |     |     |     | 104.20        |
|                                                        |                  |              |        |        | X      |     |     |     | 104.20        |
|                                                        |                  |              |        |        |        | X   |     |     | 104.19        |
|                                                        |                  |              |        |        |        |     | X   |     | 104.14        |
|                                                        |                  |              |        |        |        |     |     | X   | 104.08        |
|                                                        |                  | 2 parameters |        | X      | X      |     |     |     | 104.27        |
|                                                        |                  |              |        | X      |        | X   |     |     | 104.25        |
|                                                        |                  |              |        | X      |        |     | X   |     | 104.21        |
|                                                        |                  |              |        | X      |        |     |     | X   | 104.12        |
|                                                        |                  |              |        |        | X      | X   |     |     | 104.26        |
|                                                        |                  |              |        |        | X      |     | X   |     | 104.22        |
|                                                        |                  |              |        |        | X      |     |     | X   | 104.13        |
|                                                        |                  |              |        |        |        | X   | X   |     | 104.21        |
|                                                        |                  |              |        |        |        | X   |     | X   | 104.14        |
|                                                        |                  |              |        |        |        |     | X   | X   | <b>104.18</b> |
|                                                        |                  | 3 parameters |        | X      | X      | X   |     |     | 104.30        |
|                                                        |                  |              |        | X      | X      |     | X   |     | 104.29        |
|                                                        |                  |              |        | X      | X      |     |     | X   | 104.20        |
|                                                        |                  |              |        | X      |        | X   | X   |     | 104.23        |
|                                                        |                  |              |        | X      |        | X   |     | X   | 104.16        |

|                                                                         |             |   |   |   |   |   |        |
|-------------------------------------------------------------------------|-------------|---|---|---|---|---|--------|
|                                                                         |             | X |   |   | X | X | 104.21 |
|                                                                         |             |   | X | X | X |   | 104.27 |
|                                                                         |             |   | X | X |   | X | 104.20 |
|                                                                         |             |   | X |   | X | X | 104.23 |
|                                                                         |             |   |   | X | X | X | 104.23 |
| 4 parameters                                                            | X           | X | X | X |   |   | 104.28 |
|                                                                         | X           | X | X |   |   | X | 104.21 |
|                                                                         | X           | X |   |   | X | X | 104.29 |
|                                                                         | X           |   | X | X | X | X | 104.24 |
|                                                                         |             | X | X | X | X | X | 104.28 |
| 5 parameters                                                            | X           | X | X | X | X | X | 104.28 |
| <b>Chill Coma Temperature</b> (LME - site x haplotype as random factor) |             |   |   |   |   |   |        |
| Test hypothesis                                                         | 1 parameter | X |   |   |   |   | 183.96 |
| Model comparison                                                        | null model  |   |   |   |   |   | 180.77 |
|                                                                         | 1 parameter | X |   |   |   |   | 182.77 |
|                                                                         |             |   | X |   |   |   | 182.05 |
|                                                                         |             |   |   | X |   |   | 225.90 |
|                                                                         |             |   |   |   | X |   | 183.47 |
|                                                                         |             |   |   |   |   | X | 183.07 |
| 2 parameters                                                            | X           | X |   |   |   |   | 182.79 |
|                                                                         | X           |   | X |   |   |   | —      |
|                                                                         | X           |   |   |   | X |   | 186.33 |
|                                                                         | X           |   |   |   |   | X | 183.63 |
|                                                                         |             | X | X |   |   |   | —      |
|                                                                         |             | X |   |   | X |   | 185.61 |
|                                                                         |             | X |   |   |   | X | 185.32 |
|                                                                         |             |   | X | X |   |   | 226.02 |
|                                                                         |             |   | X |   |   | X | 198.19 |
|                                                                         |             |   |   |   | X | X | 183.43 |

|                                                  |             |          |   |   |          |               |
|--------------------------------------------------|-------------|----------|---|---|----------|---------------|
|                                                  |             |          |   |   |          |               |
| 3 parameters                                     | X           | X        | X |   |          | –             |
|                                                  | X           | X        |   | X |          | 184.58        |
|                                                  | <b>X</b>    | <b>X</b> |   |   | <b>X</b> | <b>179.13</b> |
|                                                  | X           |          | X | X |          | –             |
|                                                  | X           |          | X |   | X        | 204.65        |
|                                                  | X           |          |   | X | X        | 184.17        |
|                                                  |             | X        | X | X |          | –             |
|                                                  |             | X        | X |   | X        | –             |
|                                                  |             | X        |   | X | X        | 185.65        |
|                                                  |             |          | X | X | X        | –             |
| 4 parameters                                     | X           | X        | X | X |          | 207.95        |
|                                                  | X           | X        | X |   | X        | 186.15        |
|                                                  | X           | X        |   | X | X        | 179.89        |
|                                                  | X           |          | X | X | X        | –             |
|                                                  |             | X        | X | X | X        | –             |
| 5 parameters                                     | X           | X        | X | X | X        | 194.50        |
| <b>Activity Recovery</b> (LM – no random factor) |             |          |   |   |          |               |
| Test hypothesis                                  | 1 parameter | X        |   |   |          | 172.75        |
| Model comparison                                 | null model  |          |   |   |          | <b>172.35</b> |
| 1 parameter                                      | X           |          |   |   |          | 173.86        |
|                                                  |             | X        |   |   |          | 173.88        |
|                                                  |             |          | X |   |          | 174.00        |
|                                                  |             |          |   | X |          | 174.34        |
|                                                  |             |          |   |   | X        | 174.15        |
|                                                  |             |          |   |   |          |               |
| 2 parameters                                     | X           | X        |   |   |          | 175.86        |
|                                                  | X           |          | X |   |          | 175.84        |
|                                                  | X           |          |   | X |          | 175.82        |
|                                                  | X           |          |   |   | X        | 175.43        |
|                                                  |             | X        | X |   |          | 175.84        |

|              |   |   |   |   |   |   |        |
|--------------|---|---|---|---|---|---|--------|
|              |   |   | X |   | X |   | 175.84 |
|              |   |   | X |   |   | X | 175.46 |
|              |   |   |   | X | X |   | 175.98 |
|              |   |   |   | X |   | X | 175.87 |
|              |   |   |   |   | X | X | 175.89 |
| 3 parameters | X | X | X |   |   |   | 177.84 |
|              | X | X |   |   | X |   | 177.81 |
|              | X | X |   |   |   | X | 177.43 |
|              | X |   | X | X |   |   | 177.82 |
|              | X |   | X |   |   | X | 177.37 |
|              | X |   |   |   | X | X | 177.19 |
|              |   | X | X | X |   |   | 177.83 |
|              |   | X | X |   |   | X | 177.46 |
|              |   | X |   | X | X |   | 177.22 |
|              |   |   | X | X | X |   | 177.42 |
| 4 parameters | X | X | X | X |   |   | 179.81 |
|              | X | X | X |   |   | X | 179.37 |
|              | X | X |   | X | X |   | 179.19 |
|              | X |   | X | X | X |   | 179.19 |
|              |   | X | X | X | X |   | 179.21 |
| 5 parameters | X | X | X | X | X |   | 181.19 |
